# Supplementary material for: Investigation of morphometric features of auricle in newborns and etiology of auricle deformity
Source: PubMed Central journal article supplement — Pediatr Investig. 2024 Jul 29;8(4):278–86. doi: 10.1002/ped4.12445 (PMC11664541; doi:10.1002/ped4.12445), 2024-07-29
Supplement: PED4-8-278-s001.pdf [file PED4-8-278-s001.pdf]

## **Supplementary Material for**

### **Investigation of morphometric features of auricle in newborns and etiology of auricle deformity**

Xueqing Zhou, Xieling Peng, Yuran Ding, Yingjie Zhu, Dan Tian, Minyan Wu,  
Xiangdong Qi, Bin Zhang

**Table S1** Normal auricle morphology of newborn within one week of birth in southern China

| <b>Normal auricle</b>                                            | <b>Average</b>    | <b>95% confidence interval</b> |
|------------------------------------------------------------------|-------------------|--------------------------------|
| Morphologic ear length (cm)                                      | $2.22 \pm 0.22$   | 2.20–2.24                      |
| Morphologic ear breadth (cm)                                     | $2.56 \pm 0.22$   | 2.54–2.58                      |
| Physiognomic ear length (cm)                                     | $3.56 \pm 0.26$   | 3.54–3.58                      |
| Physiognomic ear breadth (cm)                                    | $2.12 \pm 0.20$   | 2.10–2.14                      |
| Antihelix angle (°)                                              | $86.71 \pm 13.73$ | 85.43–7.99                     |
| The vertical distance of cephalo-auricular (cm)                  | $0.73 \pm 0.22$   | 0.71–0.75                      |
| Vertical distance of cephalo-superaurale (cm)                    | $0.50 \pm 0.16$   | 0.49–0.52                      |
| The distance between helix and antihelix (cm)                    | $0.85 \pm 0.22$   | 0.83–0.87                      |
| The ratio of morphologic ear breadth to morphologic ear length   | $1.16 \pm 0.12$   | 1.15–1.17                      |
| The ratio of physiognomic ear breadth to physiognomic ear length | $0.60 \pm 0.06$   | 0.59–0.60                      |

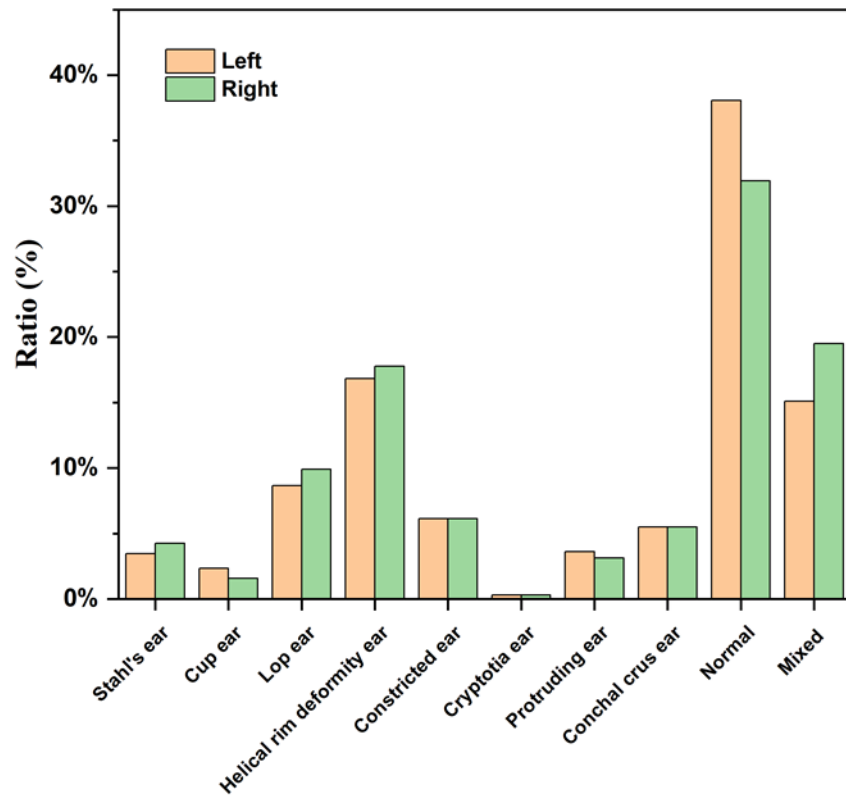

**Figure S1** The comparison of the incidence rates of various ear malformations in the left and right ears.

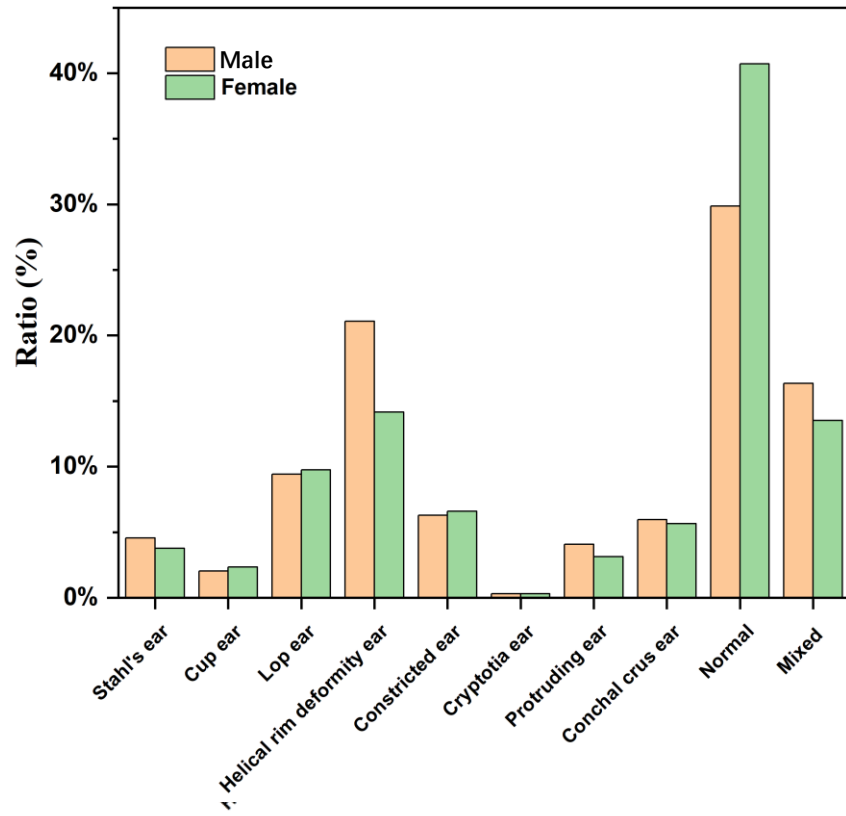

**Figure S2** Gender ratios of neonatal auricle malformations.

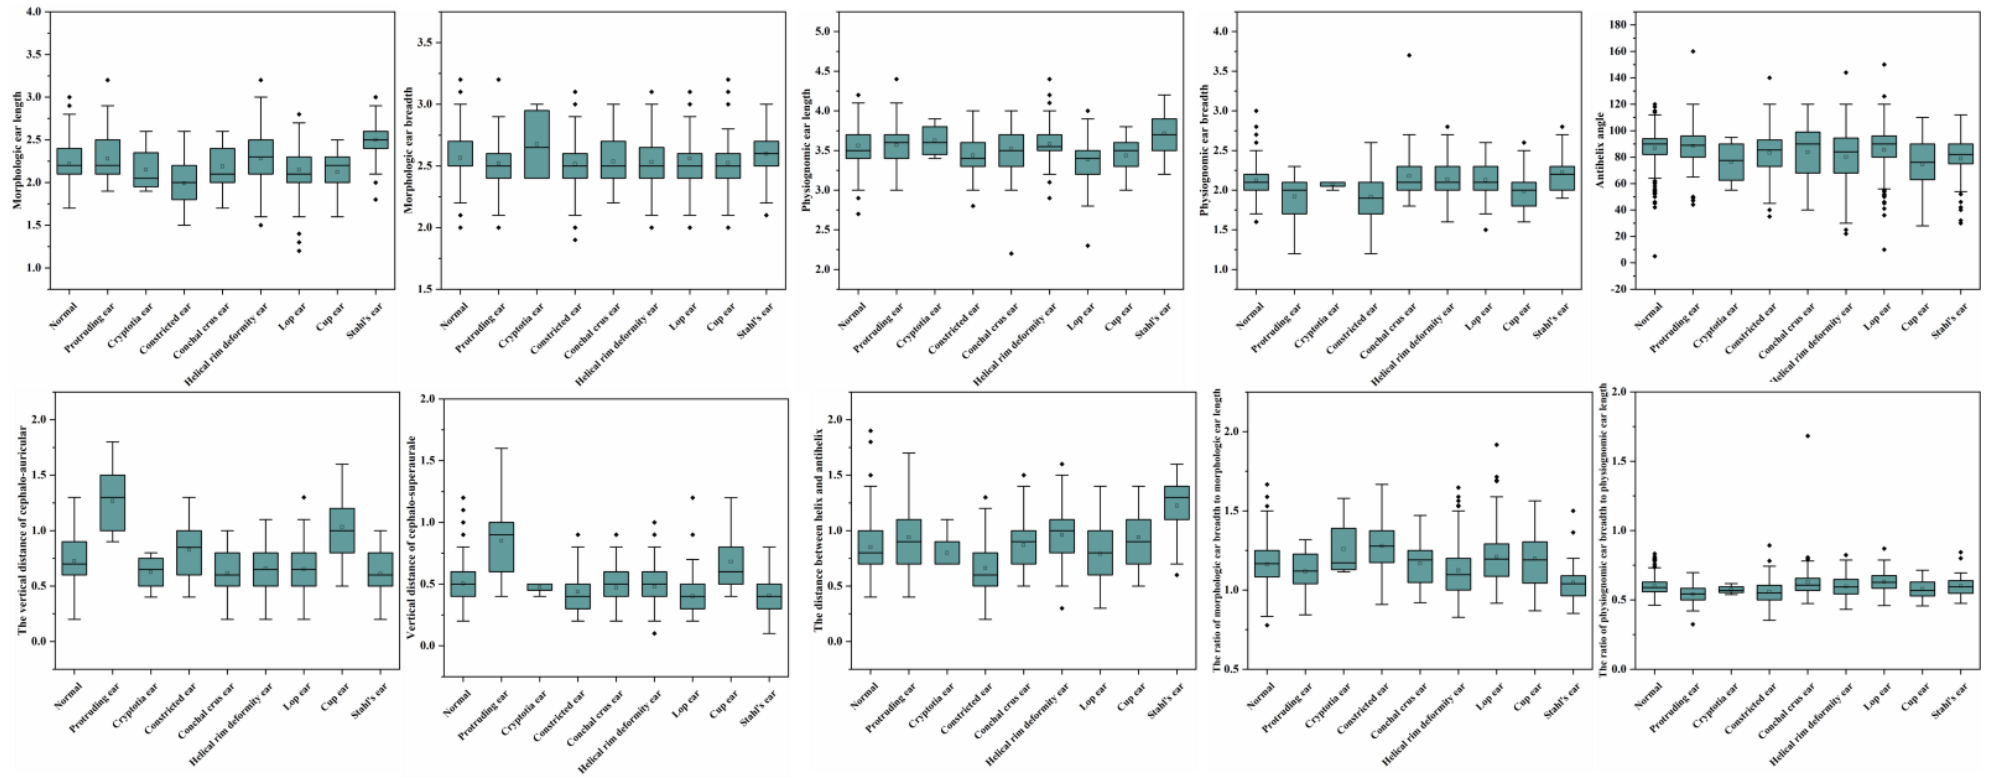

**Figure S3** The difference of various auricle morphology by measurement indexes.
